# Supplementary material for: Electrochemical degradation of a C6-perfluoroalkyl substance (PFAS) using a simple activated carbon cathode
Source: Royal Society of Chemistry journal article supplement (doi:10.1039/d3ew00543g), 2023-11-14
Supplement: d3ew00543g1.pdf [file d3ew00543g1.pdf]

**Supplementary Information for**  
**Electrochemical Degradation of a C6-Perfluoroalkyl Substance**  
**(PFAS) using a Simple Activated Carbon Cathode**

Diana Ackerman Grunfeld<sup>a</sup>, Adele M. Jones<sup>a</sup>, Jun Sun<sup>b</sup>, Song Thao Le<sup>a</sup>, Russell Pickford<sup>c</sup>, Qingguo Huang<sup>d</sup>, Michael Manefield<sup>a</sup>, Naresh Kumar<sup>b</sup>, Matthew Lee<sup>a</sup> and Denis M. O'Carroll<sup>a\*</sup>

<sup>a</sup> School of Civil and Environmental Engineering, Water Research Centre, The University of New South Wales, Sydney, NSW 2052, Australia.

<sup>b</sup> School of Chemistry, The University of New South Wales, Sydney, NSW 2052, Australia.

<sup>c</sup> Bioanalytical Mass Spectrometry Facility, Mark Wainwright Analytical Centre, The University of New South Wales, Sydney, NSW 2052, Australia.

<sup>d</sup> College of Agricultural and Environmental Sciences Crop and Soil Sciences, The University of Georgia, Griffin, GA 30223, USA.

\* Corresponding Author. Email: [d.ocarroll@unsw.edu.au](mailto:d.ocarroll@unsw.edu.au)

† Electronic Supplementary Information (ESI) available.

## Table of Figures

|                                                                                                                                                                                                                                                                                                                                                                                                                                                                                                               |    |
|---------------------------------------------------------------------------------------------------------------------------------------------------------------------------------------------------------------------------------------------------------------------------------------------------------------------------------------------------------------------------------------------------------------------------------------------------------------------------------------------------------------|----|
| Fig. S1. Picture of the H-cell setup employed (left) and a close up of the packed GAC- stainless steel mesh electrodes used (right). .....                                                                                                                                                                                                                                                                                                                                                                    | 3  |
| Fig. S2. Sorption of 50 or 100 $\mu\text{M}$ PFMeUPA to 1, 5 and 10 g/L of GAC over 24 hours. (error bars represent one standard deviation from the mean ( $n = 3$ )) .....                                                                                                                                                                                                                                                                                                                                   | 3  |
| Fig. S3. Picture of the single cell setup (left) and a close-up of the GAC packed square mesh cathode employed (right). .....                                                                                                                                                                                                                                                                                                                                                                                 | 4  |
| Fig. S4. The impact of unbuffered 0.1 M $\text{NaClO}_4$ or 0.1 M $\text{Na}_2\text{SO}_4$ as the electrolyte in the reductive defluorination of PFMeUPA. Data points are the average of duplicate measurements and errors represent the range. First order rates were measured between 2 and 5 hours, with rate constants determined to be $9.15 \pm 1.32 \times 10^{-5} \text{ s}^{-1}$ in 0.1 M $\text{Na}_2\text{SO}_4$ and $7.54 \pm 0.33 \times 10^{-5} \text{ s}^{-1}$ in 0.1 M $\text{NaClO}_4$ ..... | 4  |
| Fig. S5. Percentage defluorination of PFMeUPA following the application of 10 V at 70°C in a pH 6.8 buffered solution in the presence or absence vitamin B <sub>12</sub> (100 $\mu\text{M}$ ). Data points represent the average of duplicate measurements and error bars represent the range. ....                                                                                                                                                                                                           | 5  |
| Fig. S6. Control experiments indicating no loss of PFMeUPA or generation of fluoride after reaction of PFMeUPA in the H-cell with nitrogen gas purging over 85 °C in the absence of an applied volage of 10 V. The red dashed line represents 100% $C/C_0$ (i.e. no loss of PFMeUPA) and the maximum concentration of fluoroide able to be generated which is 0.9 $\mu\text{M}$ . Data points are the average of duplicate measurements, and error bars represent the range about the average. ....           | 5  |
| Fig. S7. Concentration of PFMeUPA measured in the aqueous collected from experiments conducted in the H-cell at an applied cell voltage of 10 V at 55, 70 and 85°C. Data points represent the average of duplicate measurements and error bars represent the range. Note that the time zero measurement represented here is that measured after 12 h of adsorption.....                                                                                                                                       | 6  |
| Fig. S8. Defluorination of PFMeUPA with an applied cell voltage of 10 V at 55, 70 and 85°C. Dashed lines show the mass balance of dissolved PFMeUPA and fluoride at each timepoint (left axis). Data points represent the average of duplicate fluoride measurements and error bars represent the range about the average (right axis).....                                                                                                                                                                   | 6  |
| Fig. S9. Screenshots of HRMS data for all of the degradation products identified.....                                                                                                                                                                                                                                                                                                                                                                                                                         | 10 |
| Fig. S10. Bond dissociation energies (BDEs) in $\text{kJ}\cdot\text{mol}^{-1}$ determined for the reduction pathway identified from the HRMS data. Lowest energy values are highlighted in yellow. Those values which are within 1 $\text{kJ}\cdot\text{mol}^{-1}$ of the lowest value are highlighted in orange. ....                                                                                                                                                                                        | 11 |
| Fig. S11. LCMS spectra at time 0 ( $T_0$ ) and after 4 hours without (A) and with (B) the addition of vitamin B12 as the catalyst. Total ater 4 hours represent the sum of aqueous and sorbed PFOS concentration after 4 hours. ....                                                                                                                                                                                                                                                                          | 11 |

## Table of Tables

|                                                                                                                                                                                                                                                                                                                                                                                                                                      |    |
|--------------------------------------------------------------------------------------------------------------------------------------------------------------------------------------------------------------------------------------------------------------------------------------------------------------------------------------------------------------------------------------------------------------------------------------|----|
| Table S1. Parameters summary for the detection of PFOS and its isomers. ....                                                                                                                                                                                                                                                                                                                                                         | 13 |
| Table S2. Table of possible breakdown products that were analysed for using the Thermo LTQ Orbitrap XL ultra-high resolution mass spectrophotometer, where M refers to the molecular mass of the breakdown product, and MH <sup>-</sup> refers to the mass of the product in negative ion mode. Those products observed in the electrochemical cell or zinc reactions are noted. Note that no saturated products were observed. .... | 13 |

Table S3. Averaged integration areas and retention times of degradation products identified from the HRMS data in the 85°C electrochemical experiment samples (top) and 70°C zinc experiment samples (bottom). .....14

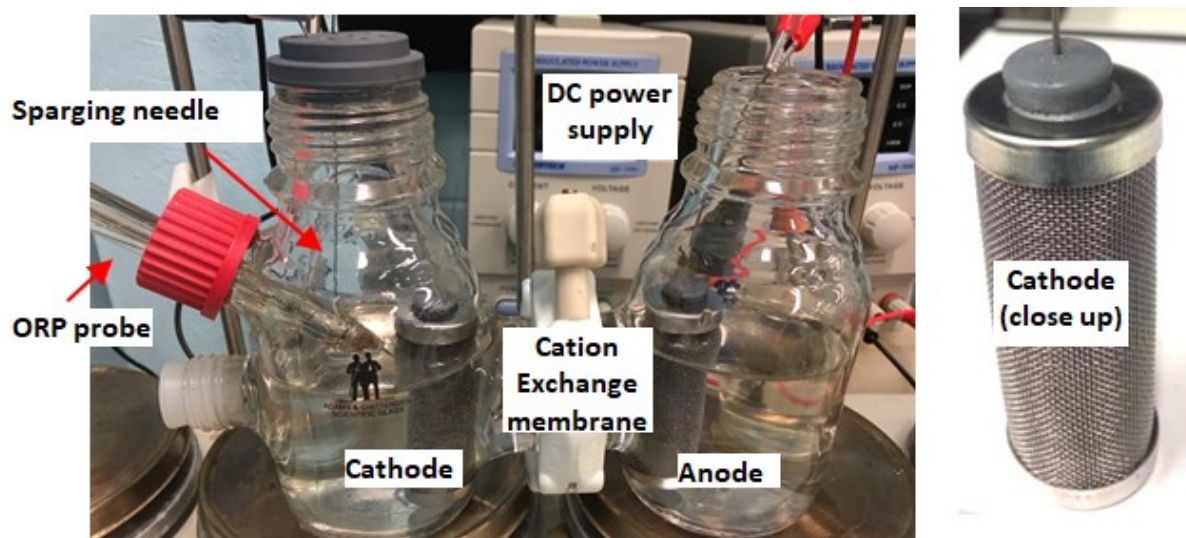

**Fig. S1.** Picture of the H-cell setup employed (left) and a close up of the packed GAC-stainless steel mesh electrodes used (right).

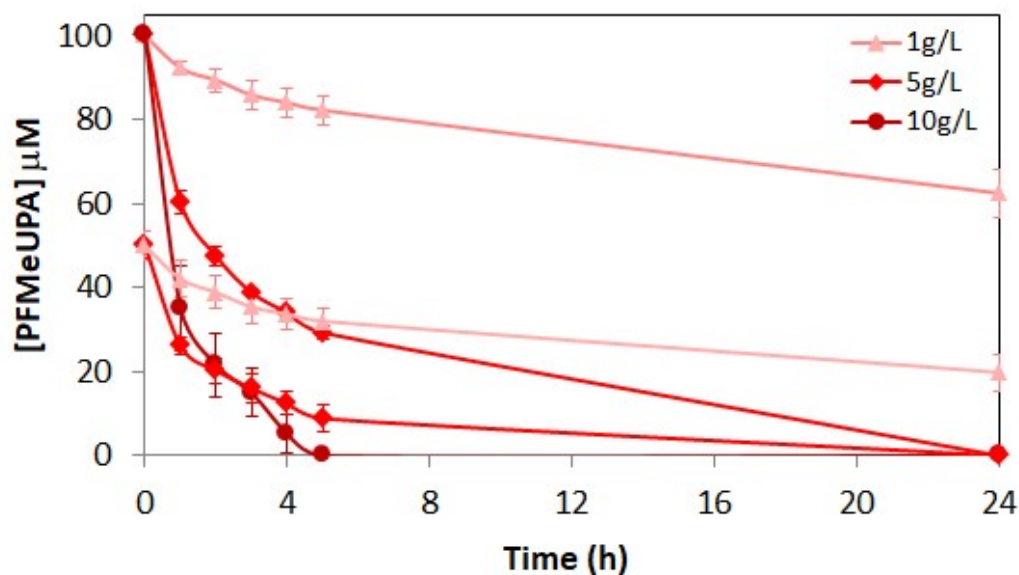

**Fig. S2.** Sorption of 50 or 100  $\mu\text{M}$  PFMeUPA to 1, 5 and 10 g/L of GAC over 24 hours. (error bars represent one standard deviation from the mean ( $n = 3$ ))

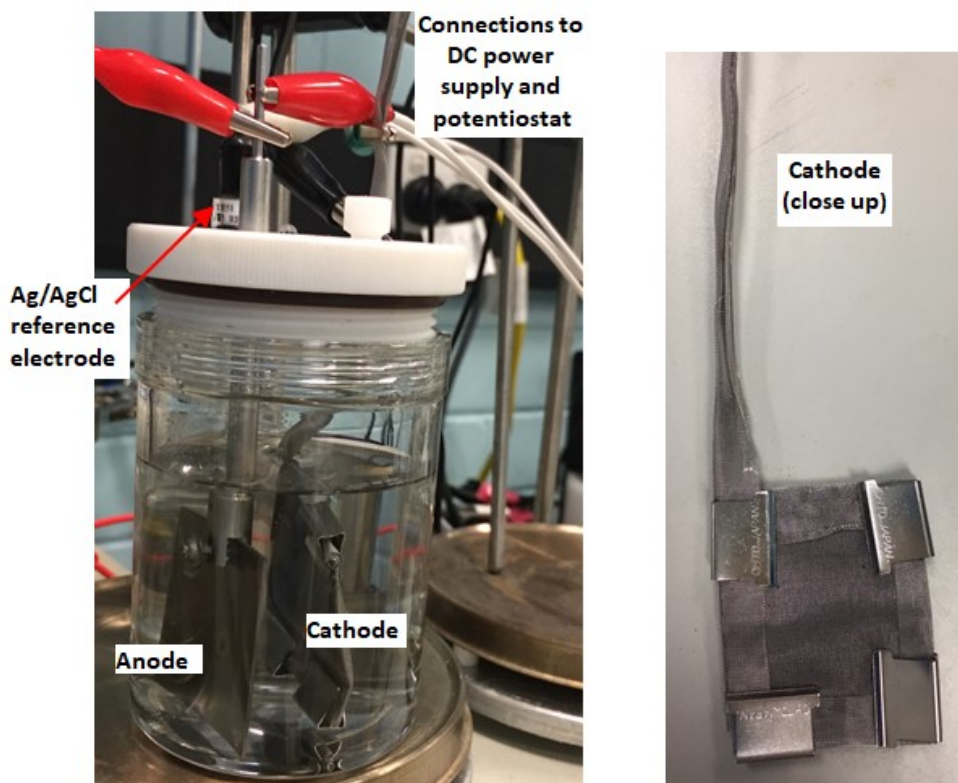

**Fig. S3.** Picture of the single cell setup (left) and a close-up of the GAC packed square mesh cathode employed (right).

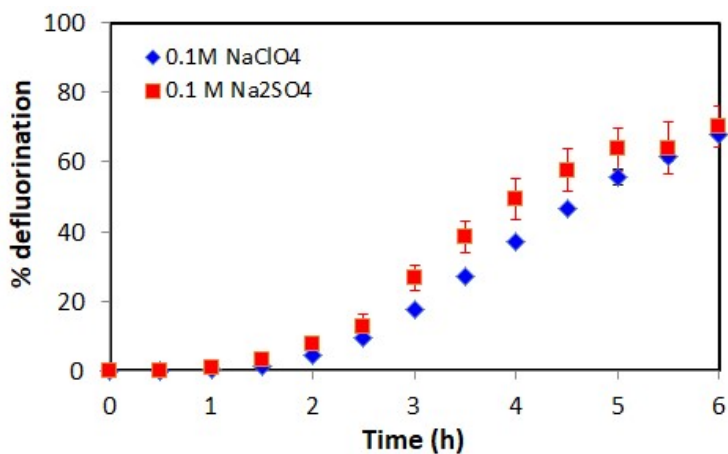

**Fig. S4.** The impact of unbuffered 0.1 M NaClO<sub>4</sub> or 0.1 M Na<sub>2</sub>SO<sub>4</sub> as the electrolyte in the reductive defluorination of PFMeUPA. Data points are the average of duplicate measurements and errors represent the range. First order rates were measured between 2 and 5 hours, with rate constants determined to be  $9.15 \pm 1.32 \times 10^{-5} \text{ s}^{-1}$  in 0.1 M Na<sub>2</sub>SO<sub>4</sub> and  $7.54 \pm 0.33 \times 10^{-5} \text{ s}^{-1}$  in 0.1 M NaClO<sub>4</sub>.

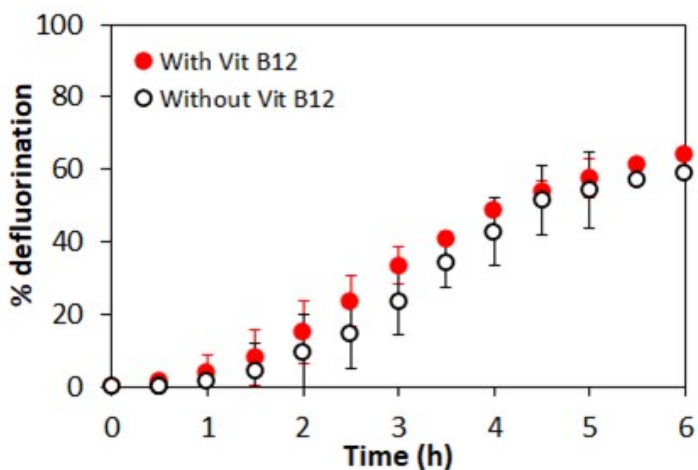

**Fig. S5.** Percentage defluorination of PFMeUPA following the application of 10 V at 70°C in a pH 6.8 buffered solution in the presence or absence vitamin B<sub>12</sub> (100 μM). Data points represent the average of duplicate measurements and error bars represent the range.

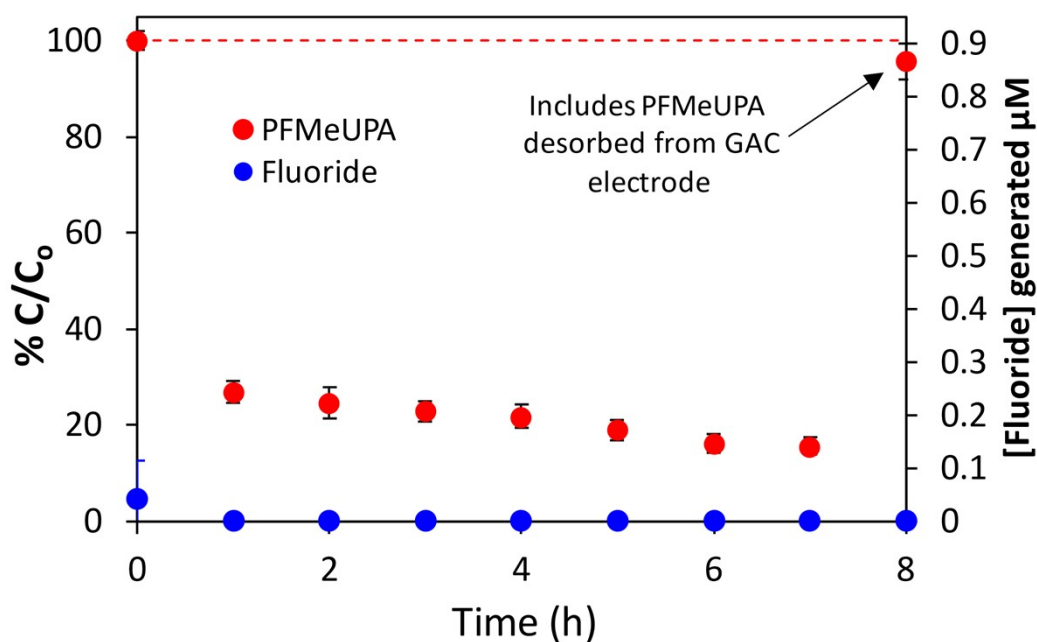

**Fig. S6.** Control experiments indicating no loss of PFMeUPA or generation of fluoride after reaction of PFMeUPA in the H-cell with nitrogen gas purging over 85 °C in the absence of an applied voltage of 10 V. The red dashed line represents 100% C/C<sub>0</sub> (i.e. no loss of PFMeUPA) and the maximum concentration of fluoride able to be generated which is 0.9 μM. Data points are the average of duplicate measurements, and error bars represent the range about the average.

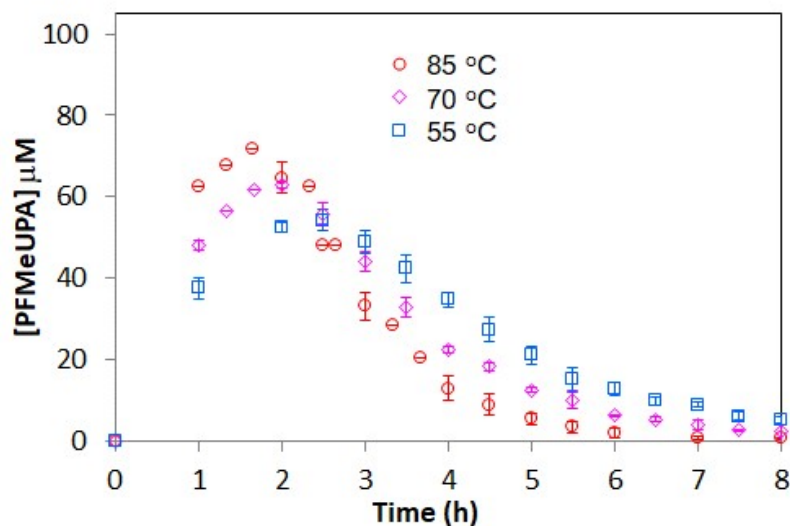

**Fig. S7.** Concentration of PFMeUPA measured in the aqueous collected from experiments conducted in the H-cell at an applied cell voltage of 10 V at 55, 70 and 85°C. Data points represent the average of duplicate measurements and error bars represent the range. Note that the time zero measurement represented here is that measured after 12 h of adsorption.

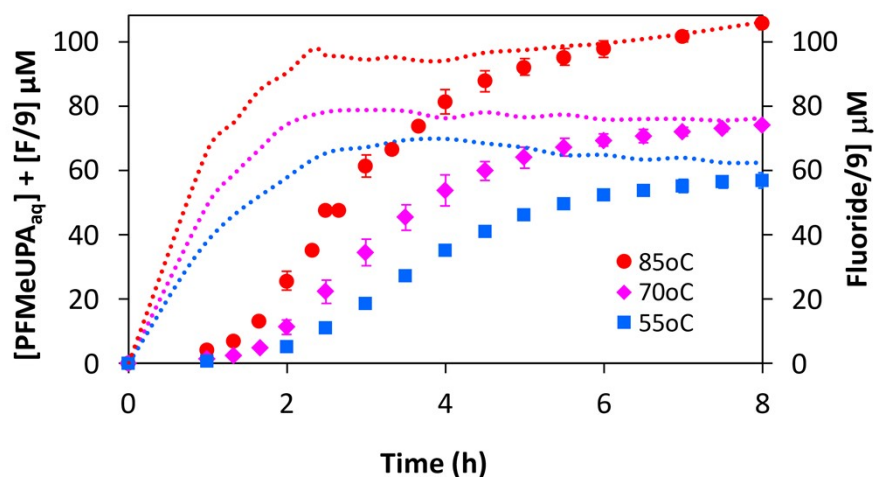

**Fig. S8.** Defluorination of PFMeUPA with an applied cell voltage of 10 V at 55, 70 and 85°C. Dashed lines show the mass balance of dissolved PFMeUPA and fluoride at each timepoint (left axis). Data points represent the average of duplicate fluoride measurements and error bars represent the range about the average (right axis).

RT: 0.00 - 20.00 SM: 7B

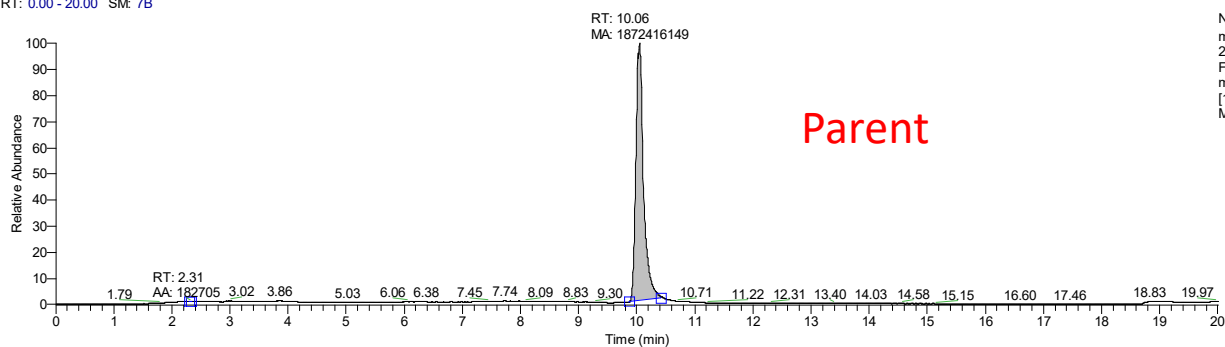

NL: 2.07E8  
m/z=  
274.9705-274.9805  
F: FTMS - p ESI Full  
ms  
[110.0000-400.0000]  
MS 85C\_5h

85C\_5h #2571 RT: 9.99 AV: 1 NL: 1.33E8  
T: FTMS - p ESI Full ms [110.0000-400.0000]

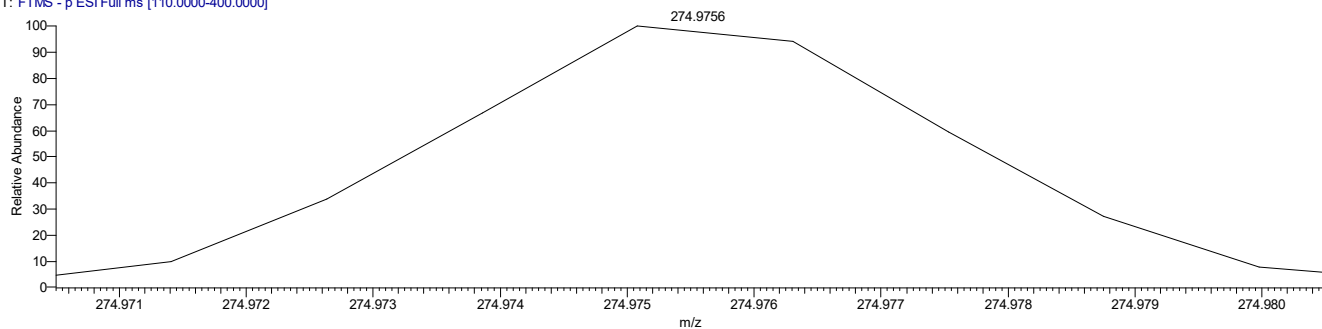

SOL Injection

RT: 0.00 - 20.00 SM: 7B

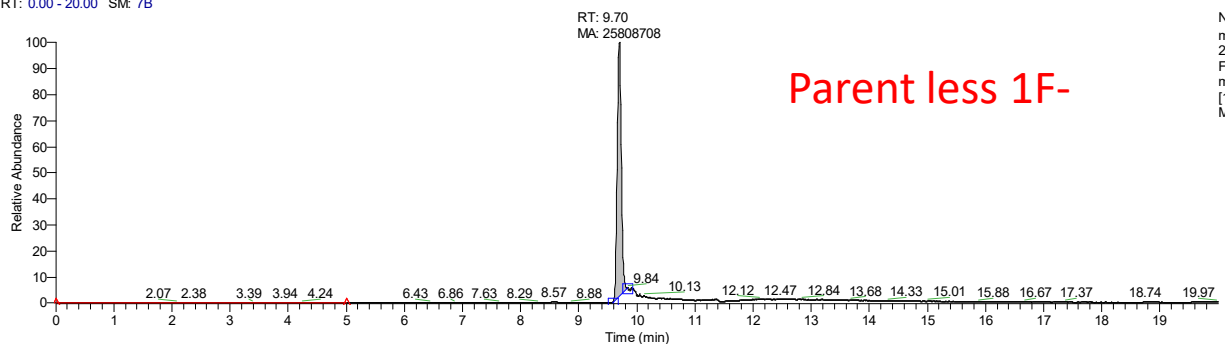

NL: 5.37E6  
m/z=  
256.9799-256.9899  
F: FTMS - p ESI Full  
ms  
[110.0000-400.0000]  
MS 85C\_1h

85C\_1h #2488 RT: 9.69 AV: 1 NL: 4.69E6  
T: FTMS - p ESI Full ms [110.0000-400.0000]

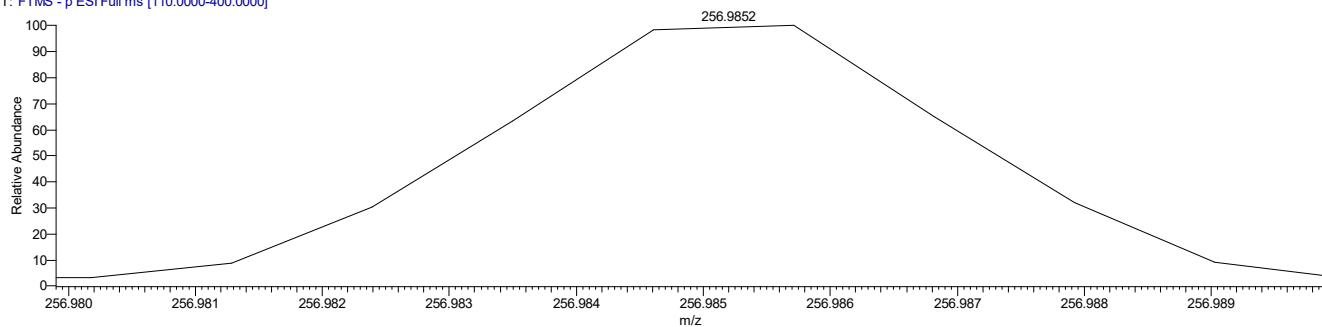

RT: 0.00 - 20.00 SM: 7B

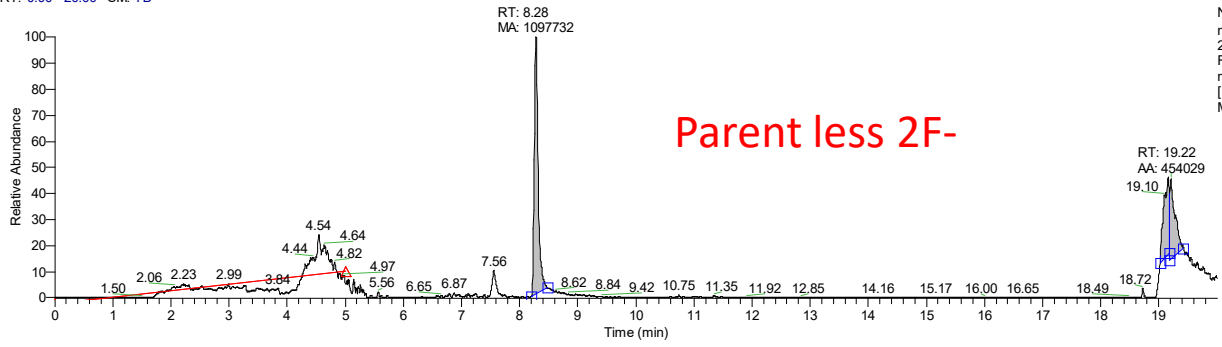

NL: 2.41E5  
m/z=  
238.9893-238.9993  
F: FTMS - p ESI Full  
ms  
[110.0000-400.0000]  
MS 85C\_1h

85C\_1h #2134 RT: 8.29 AV: 1 NL: 2.42E5  
T: FTMS - p ESI Full ms [110.0000-400.0000]

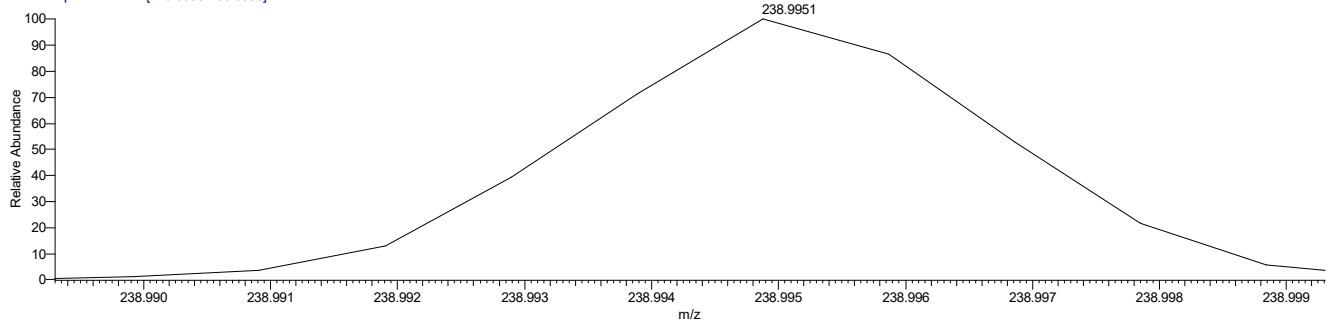

RT: 0.00 - 20.00 SM: 7B

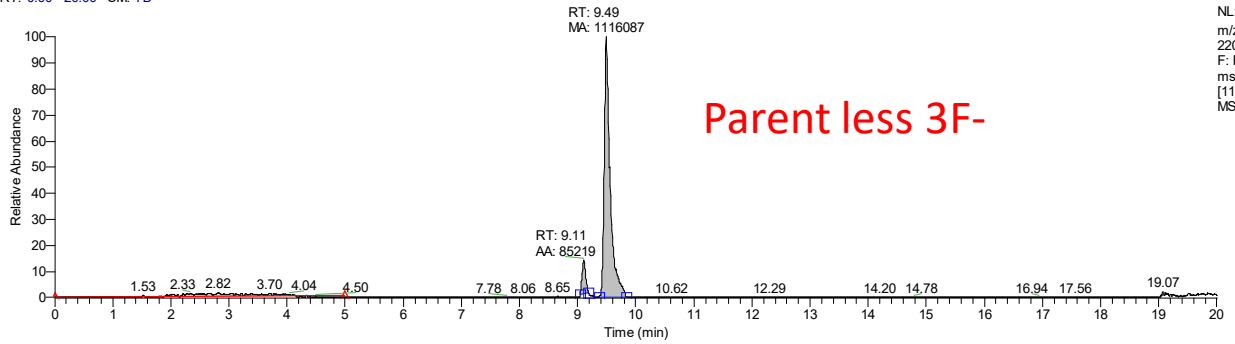

NL: 1.58E5  
m/z=  
220.9987-221.0087  
F: FTMS - p ESI Full  
ms  
[110.0000-400.0000]  
MS 85C\_3h

85C\_3h #2472 RT: 9.52 AV: 1 NL: 1.40E5  
T: FTMS - p ESI Full ms [110.0000-400.0000]

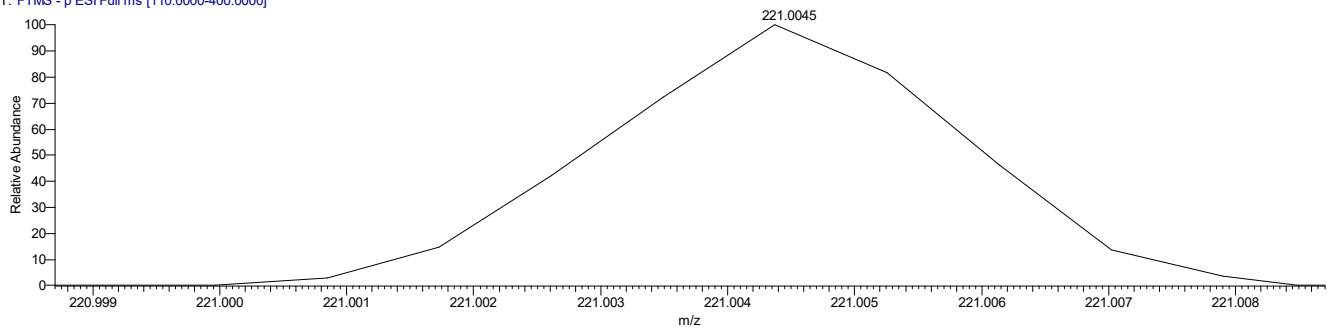



RT: 0.00 - 20.00 SM: 7B

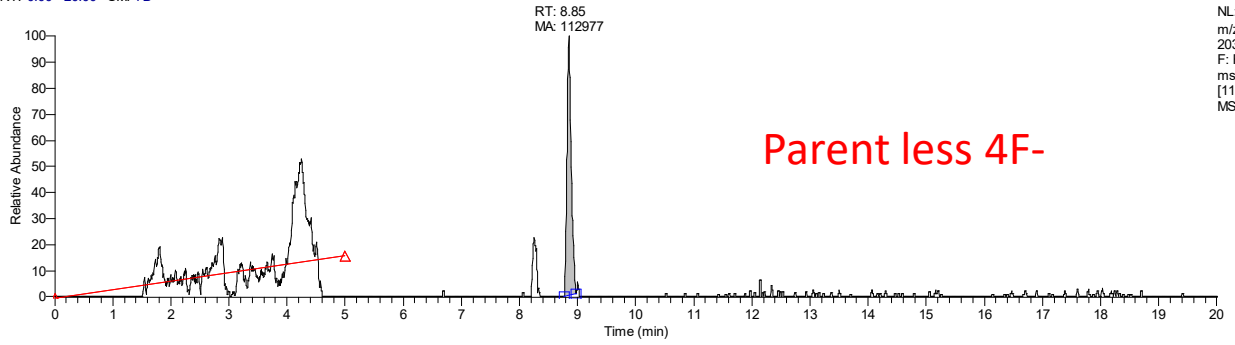

NL: 2.24E4  
m/z=  
203.0081-203.0181  
F: FTMS - p ESI Full  
ms  
[110.0000-400.0000]  
MS 85C\_5h

85C\_5h #2263 RT: 8.85 AV: 1 NL: 1.86E4  
T: FTMS - p ESI Full ms [110.0000-400.0000]

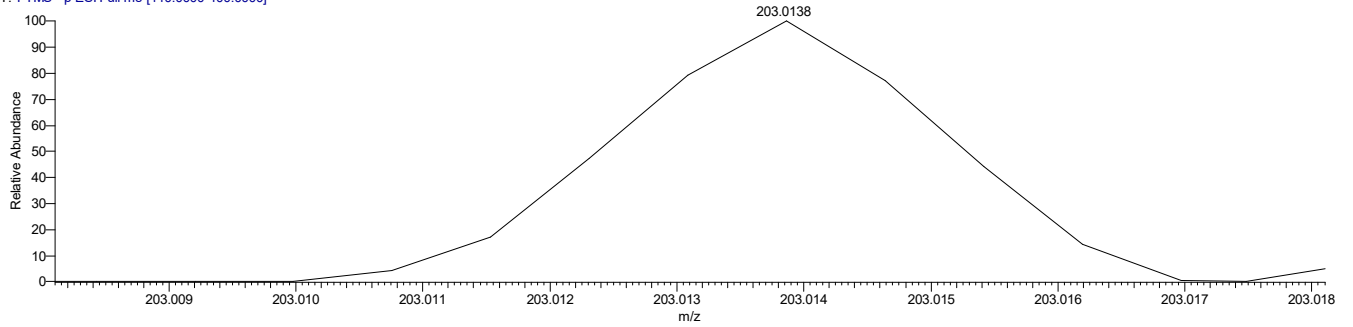

RT: 0.00 - 20.00 SM: 7B

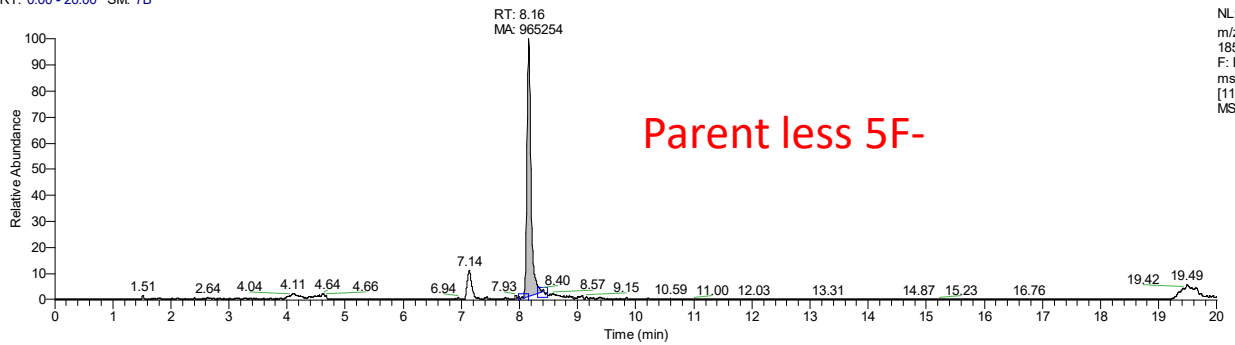

NL: 2.02E5  
m/z=  
185.0176-185.0276  
F: FTMS - p ESI Full  
ms  
[110.0000-400.0000]  
MS 85C\_6h

85C\_6h #2086 RT: 8.16 AV: 1 NL: 1.81E5  
T: FTMS - p ESI Full ms [110.0000-400.0000]

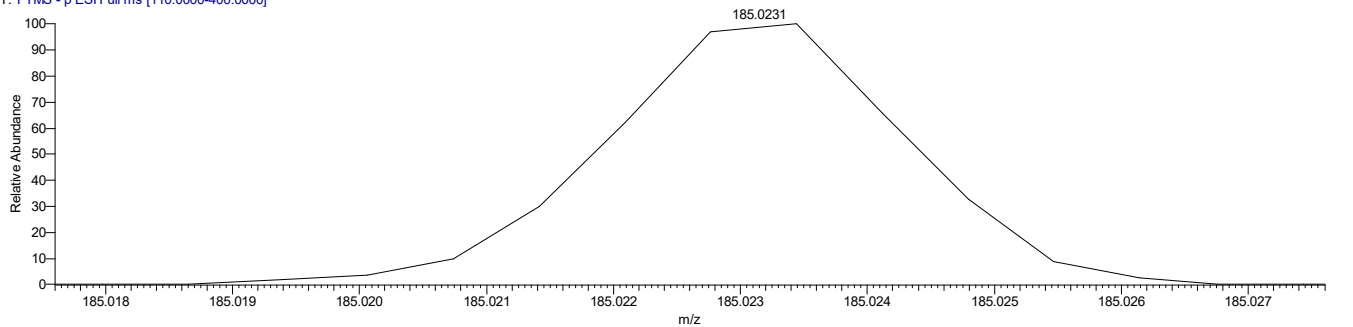

RT: 0.00 - 20.00 SM: 7B

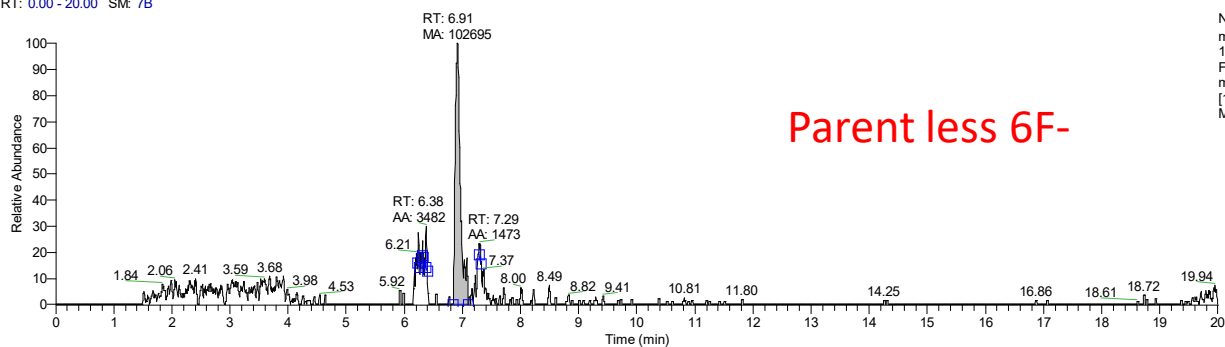

NL: 1.66E4  
m/z=  
167.0270-167.0370  
F: FTMS - p ESI Full  
ms  
[110.0000-400.0000]  
MS 85C\_6h

Parent less 6F-

85C\_6h #1755 RT: 6.93 AV: 1 SM: 7B NL: 9.18E3  
T: FTMS - p ESI Full ms [110.0000-400.0000]

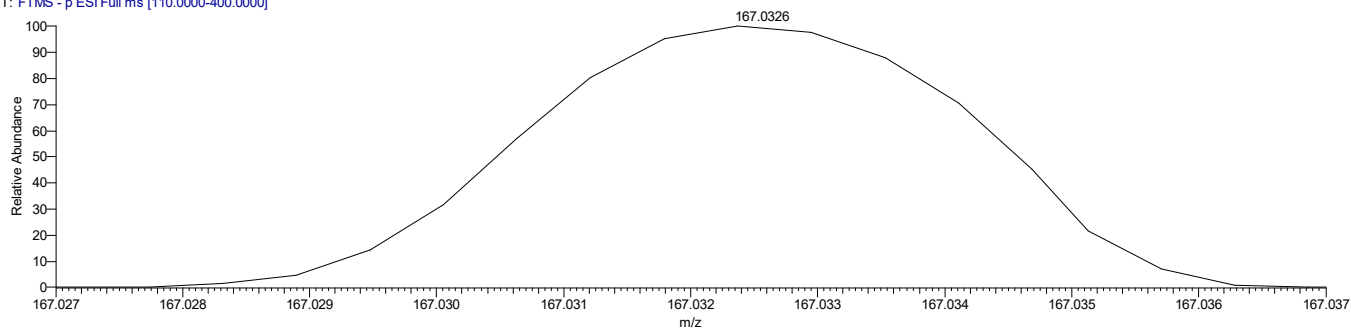

RT: 0.00 - 20.00 SM: 7B

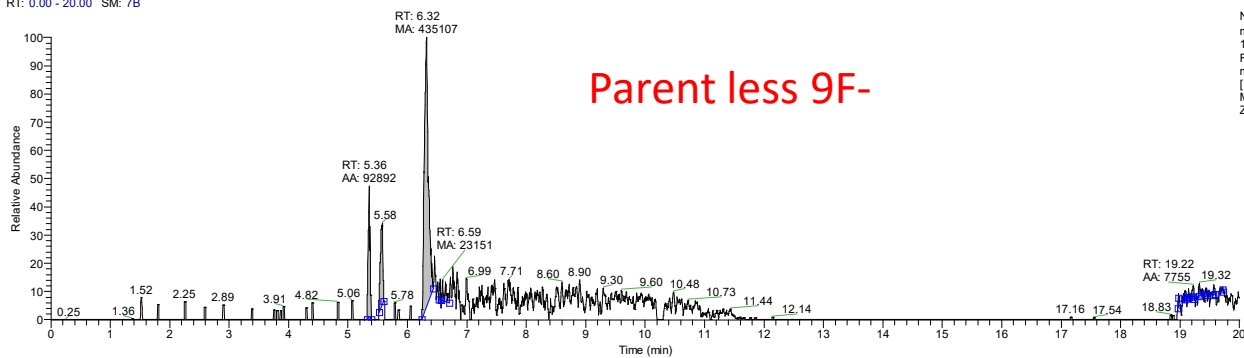

NL: 9.69E4  
m/z=  
113.0563-113.0643  
F: FTMS - p ESI Full  
ms  
[110.0000-400.0000]  
MS  
Zn-Na<sub>2</sub>SO<sub>4</sub>\_1\_T24n

Parent less 9F-

Zn-Na<sub>2</sub>SO<sub>4</sub>\_1\_T24n #1860 RT: 6.32 AV: 1 NL: 9.49E4  
T: FTMS - p ESI Full ms [110.0000-400.0000]

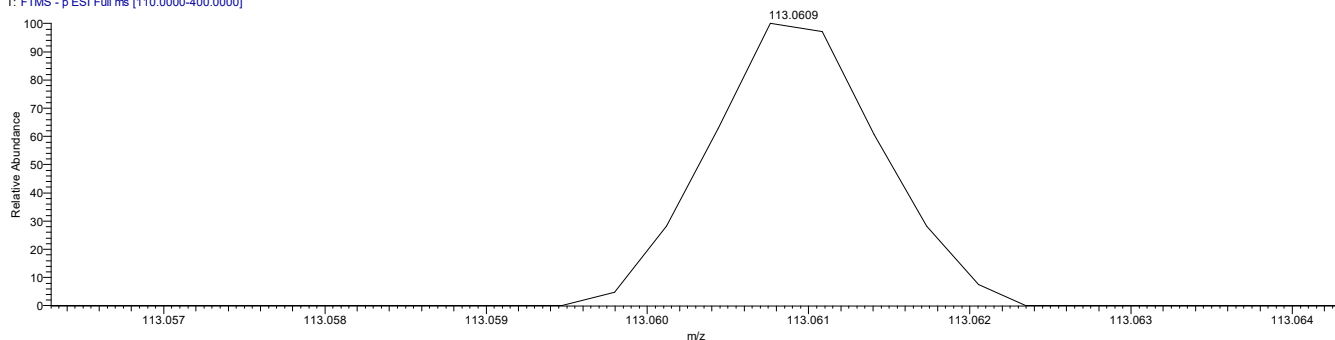

Fig. S9. Screenshots of HRMS data for all of the degradation products identified.

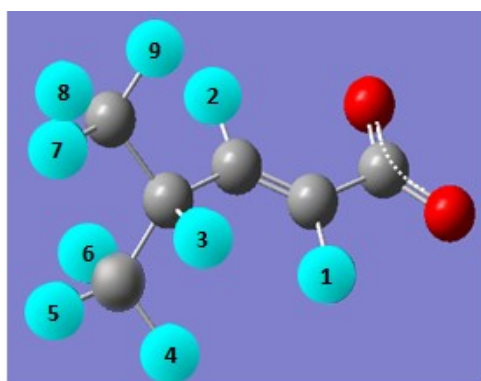

Numbering Scheme for  
Hydrodefluorination Products and  
Associated BDEs in the Table Below

| Position →  | 1      | 2      | 3      | 4      | 5      | 6      | 7      | 8      | 9      |
|-------------|--------|--------|--------|--------|--------|--------|--------|--------|--------|
| Product ↓   |        |        |        |        |        |        |        |        |        |
| PfMeUPA     | 475.71 | 472.56 | 350.86 | 492.91 | 495.87 | 494.57 | 494.39 | 492.23 | 497.82 |
| PfMeUPA -1F | 487.22 | 487.54 |        | 502.68 | 499.51 | 501.90 | 499.51 | 502.14 | 502.68 |
| PfMeUPA -2F |        | 500.01 |        | 502.52 | 499.11 | 501.04 | 499.75 | 502.27 | 502.61 |
| PfMeUPA -3F |        | 500.69 |        | 486.83 |        | 487.39 | 504.39 | 504.77 | 507.57 |
| PfMeUPA -4F |        | 501.00 |        |        |        | 463.85 | 507.72 | 506.37 | 510.11 |
| PfMeUPA -5F |        | 503.99 |        |        |        |        | 510.16 | 510.90 | 513.57 |
| PfMeUPA -6F |        |        |        |        |        |        | 512.21 | 513.57 | 515.04 |
| PfMeUPA -7F |        |        |        |        |        |        |        | 498.10 | 502.00 |
| PfMeUPA -8F |        |        |        |        |        |        |        |        | 475.78 |

**Fig. S10.** Bond dissociation energies (BDEs) in  $\text{kJ}\cdot\text{mol}^{-1}$  determined for the reduction pathway identified from the HRMS data. Lowest energy values are highlighted in yellow. Those values which are within  $1\text{ kJ}\cdot\text{mol}^{-1}$  of the lowest value are highlighted in orange.

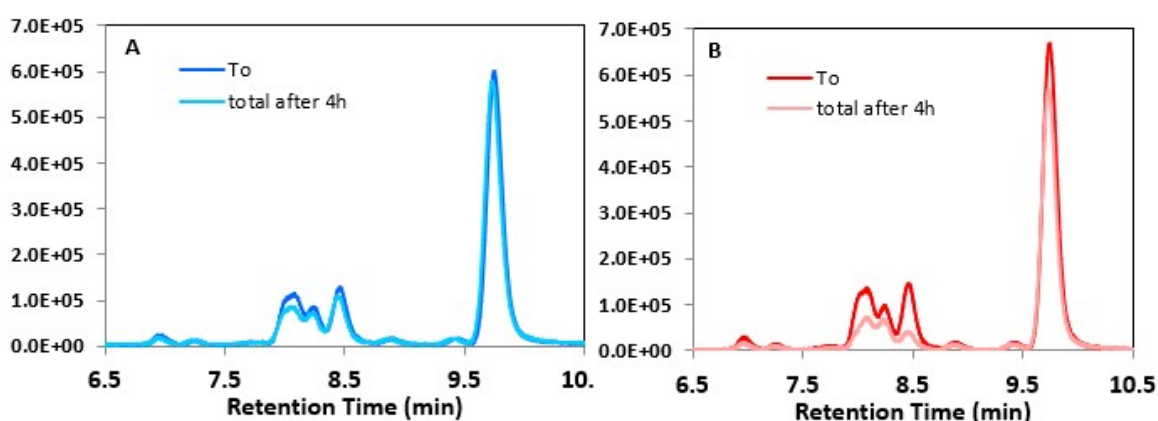

**Fig. S11.** LCMS spectra at time 0 (To) and after 4 hours without (A) and with (B) the addition of vitamin B2 as the catalyst. Total after 4 hours represent the sum of aqueous and sorbed PFOS concentration after 4 hours.

**Table S1.** Parameters summary for the detection of PFOS and its isomers.

| ISOMER                   | L-PFOS | 6-PFOS | 5- AND 3-PFOS | 4-PFOS | 3,5-PFOS | 1- AND 2-PFOS |
|--------------------------|--------|--------|---------------|--------|----------|---------------|
| <b>Precursor m/z</b>     | 499    | 499    | 499           | 499    | 499      | 499           |
| <b>Product m/z</b>       | 80     | 169    | 280           | 330    | 280      | 99            |
| <b>Dwell time (msec)</b> | 3      | 5      | 5             | 5      | 5        | 5             |
| <b>Collision energy</b>  | 41     | 35     | 35            | 35     | 35       | 40            |

**Table S2.** Table of possible breakdown products that were analysed for using the Thermo LTQ Orbitrap XL ultra-high resolution mass spectrophotometer, where M refers to the molecular mass of the breakdown product, and MH- refers to the mass of the product in negative ion mode. Those products observed in the electrochemical cell or zinc reactions are noted. Note that no saturated products were observed.

| Identifier          | Formula                                                      | MH-      | Observed | observed MH- | abs Diff exp-obs (in mmu) | accuracy in ppm | C | F | H  | O | M        |
|---------------------|--------------------------------------------------------------|----------|----------|--------------|---------------------------|-----------------|---|---|----|---|----------|
| Parent              | C <sub>6</sub> F <sub>8</sub> HO <sub>2</sub>                | 274.9755 | Yes      | 274.9755     | 0.041                     | 0.15            | 6 | 9 | 1  | 2 | 275.9833 |
| Parent less an F    | C <sub>6</sub> F <sub>8</sub> H <sub>2</sub> O <sub>2</sub>  | 256.9849 | Yes      | 256.9852     | 0.320                     | 1.24            | 6 | 8 | 2  | 2 | 257.9927 |
| Parent less 2 F-    | C <sub>6</sub> F <sub>7</sub> H <sub>3</sub> O <sub>2</sub>  | 238.9943 | Yes      | 238.9948     | 0.498                     | 2.09            | 6 | 7 | 3  | 2 | 240.0021 |
| Parent less 3 F-    | C <sub>6</sub> F <sub>6</sub> H <sub>4</sub> O <sub>2</sub>  | 221.0037 | Yes      | 221.0045     | 0.777                     | 3.52            | 6 | 6 | 4  | 2 | 222.0115 |
| Parent less 4 F-    | C <sub>6</sub> F <sub>5</sub> H <sub>5</sub> O <sub>2</sub>  | 203.0131 | Yes      | 203.0138     | 0.656                     | 3.23            | 6 | 5 | 5  | 2 | 204.0210 |
| Parent less 5 F-    | C <sub>6</sub> F <sub>4</sub> H <sub>6</sub> O <sub>2</sub>  | 185.0226 | Yes      | 185.0231     | 0.534                     | 2.89            | 6 | 4 | 6  | 2 | 186.0304 |
| Parent less 6 F-    | C <sub>6</sub> F <sub>3</sub> H <sub>7</sub> O <sub>2</sub>  | 167.0320 | Yes      | 167.0326     | 0.613                     | 3.67            | 6 | 3 | 7  | 2 | 168.0398 |
| Parent less 7 F-    | C <sub>6</sub> F <sub>2</sub> H <sub>8</sub> O <sub>2</sub>  | 149.0414 | No       |              |                           |                 | 6 | 2 | 8  | 2 | 150.0492 |
| Parent less 8 F-    | C <sub>6</sub> FH <sub>9</sub> O <sub>2</sub>                | 131.0508 | No       |              |                           |                 | 6 | 1 | 9  | 2 | 132.0587 |
| Parent less 9 F-    | C <sub>6</sub> H <sub>10</sub> O <sub>2</sub>                | 113.0603 | Yes      | 113.0609     | 0.649                     | 5.74            | 6 | 0 | 10 | 2 | 114.0681 |
| saturated less 3 F- | C <sub>6</sub> F <sub>6</sub> H <sub>6</sub> O <sub>2</sub>  | 223.0194 | No       |              |                           |                 | 6 | 6 | 6  | 2 | 224.0272 |
| saturated less 4 F- | C <sub>6</sub> F <sub>5</sub> H <sub>7</sub> O <sub>2</sub>  | 205.0288 | No       |              |                           |                 | 6 | 5 | 7  | 2 | 206.0366 |
| saturated less 5 F- | C <sub>6</sub> F <sub>4</sub> H <sub>8</sub> O <sub>2</sub>  | 187.0382 | No       |              |                           |                 | 6 | 4 | 8  | 2 | 188.0460 |
| saturated less 6 F- | C <sub>6</sub> F <sub>3</sub> H <sub>9</sub> O <sub>2</sub>  | 169.0476 | No       |              |                           |                 | 6 | 3 | 9  | 2 | 170.0555 |
| saturated less 7 F- | C <sub>6</sub> F <sub>2</sub> H <sub>10</sub> O <sub>2</sub> | 151.0571 | No       |              |                           |                 | 6 | 2 | 10 | 2 | 152.0649 |
| saturated less 8 F- | C <sub>6</sub> FH <sub>11</sub> O <sub>2</sub>               | 133.0665 | No       |              |                           |                 | 6 | 1 | 11 | 2 | 134.0743 |
| saturated less 9 F- | C <sub>6</sub> H <sub>12</sub> O <sub>2</sub>                | 115.0759 | No       |              |                           |                 | 6 | 0 | 12 | 2 | 116.0837 |

**Table S3.** Averaged integration areas and retention times of degradation products identified from the HRMS data in the 85°C electrochemical experiment samples (top) and 70°C zinc experiment samples (bottom).

| Averaged 85°C electrochemical data |            |          |          |          |          |          |          |          |          |          |          |          |                                            |
|------------------------------------|------------|----------|----------|----------|----------|----------|----------|----------|----------|----------|----------|----------|--------------------------------------------|
| Time (h) →                         | Retention  | 0        | 1        | 2        | 2.5      | 3        | 3.5      | 4        | 5        | 6        | 7        | 8        | 0.1M Na <sub>2</sub> SO <sub>4</sub> Blank |
| Product Identifier ↓               | Time (min) |          |          |          |          |          |          |          |          |          |          |          |                                            |
| Parent                             | 9.95       | 2.52E+10 | 1.78E+10 | 1.63E+10 | 1.20E+10 | 8.83E+09 | 6.49E+09 | 4.48E+09 | 1.87E+09 | 1.19E+09 | 5.42E+08 | 3.23E+08 | 7.45E+04                                   |
| Parent less 1 F-                   | 9.70       | 2.59E+06 | 2.58E+07 | 3.22E+06 | 1.46E+06 | 7.99E+05 | 5.74E+05 | 4.99E+05 | 5.30E+05 | 5.82E+05 | 3.01E+05 | 2.78E+05 | 0.00E+00                                   |
| Parent less 2 F-                   | 8.28       | 0.00E+00 | 1.10E+06 | 4.85E+06 | 5.99E+06 | 4.86E+06 | 3.52E+06 | 2.85E+06 | 1.35E+06 | 6.91E+05 | 3.35E+05 | 1.58E+05 | 0.00E+00                                   |
| Parent less 3 F-                   | 9.49       | 0.00E+00 | 0.00E+00 | 1.29E+06 | 1.50E+06 | 1.12E+06 | 1.34E+05 | 2.69E+04 | 4.31E+05 | 1.27E+05 | 9.22E+04 | 4.15E+04 | 0.00E+00                                   |
| Parent less 4 F-                   | 8.85       | 0.00E+00 | 1.45E+05 | 3.15E+05 | 1.89E+05 | 2.79E+05 | 2.50E+05 | 2.48E+05 | 1.13E+05 | 5.88E+04 | 3.14E+04 | 1.81E+04 | 0.00E+00                                   |
| Parent less 5 F-                   | 8.16       | 0.00E+00 | 1.70E+04 | 2.59E+05 | 3.68E+05 | 5.45E+05 | 7.16E+05 | 8.18E+05 | 9.09E+05 | 9.96E+05 | 8.99E+05 | 8.57E+05 | 0.00E+00                                   |
| Parent less 6 F-                   | 6.91       | 0.00E+00 | 0.00E+00 | 0.00E+00 | 1.91E+04 | 3.19E+04 | 4.88E+04 | 5.97E+04 | 8.39E+04 | 8.22E+04 | 9.42E+04 | 5.94E+04 | 0.00E+00                                   |

| Averaged 70°C zinc data |            |          |          |          |          |          |          |          |          |          |          |                                            |  |
|-------------------------|------------|----------|----------|----------|----------|----------|----------|----------|----------|----------|----------|--------------------------------------------|--|
| Time (h) →              | Retention  | 0        | 1        | 2        | 3        | 4        | 5        | 6        | 7        | 8        | 24       | 0.1M Na <sub>2</sub> SO <sub>4</sub> Blank |  |
| Product Identifier ↓    | Time (min) |          |          |          |          |          |          |          |          |          |          |                                            |  |
| Parent                  | 10.47      | 7.42E+10 | 5.88E+10 | 4.27E+10 | 3.55E+10 | 2.78E+10 | 1.79E+10 | 9.36E+09 | 5.39E+09 | 3.73E+09 | 9.35E+07 | 3.46E+03                                   |  |
| Parent less 1 F-        | 10.27      | 5.04E+08 | 2.15E+09 | 2.76E+09 | 2.74E+09 | 2.28E+09 | 1.74E+09 | 1.07E+09 | 6.66E+08 | 4.80E+08 | 2.30E+08 | 0.00E+00                                   |  |
| Parent less 2 F-        | 10.15      | 8.18E+06 | 2.02E+08 | 4.83E+08 | 6.67E+08 | 8.56E+08 | 1.11E+09 | 1.33E+09 | 1.47E+09 | 1.58E+09 | 1.60E+09 | 0.00E+00                                   |  |
| Parent less 3 F-        | 8.00       | 7.77E+04 | 4.47E+06 | 8.74E+06 | 1.11E+07 | 9.59E+06 | 1.18E+07 | 1.11E+07 | 1.13E+07 | 1.10E+07 | 5.75E+06 | 0.00E+00                                   |  |
| Parent less 4 F-        | 7.47       | 4.47E+05 | 1.11E+07 | 2.33E+07 | 3.06E+07 | 3.41E+07 | 3.78E+07 | 4.08E+07 | 4.22E+07 | 4.35E+07 | 4.08E+07 | 0.00E+00                                   |  |
| Parent less 5 F-        | 7.20       | 0.00E+00 | 1.64E+07 | 3.48E+07 | 4.35E+07 | 5.23E+07 | 6.46E+07 | 7.21E+07 | 7.62E+07 | 7.92E+07 | 8.20E+07 | 0.00E+00                                   |  |
| Parent less 6 F-        | 7.08       | 1.40E+06 | 8.62E+07 | 1.82E+08 | 2.22E+08 | 2.70E+08 | 3.37E+08 | 3.74E+08 | 3.77E+08 | 3.81E+08 | 3.67E+08 | 0.00E+00                                   |  |
| Parent less 9 F-        | 6.29       | 0.00E+00 | 4.44E+04 | 1.80E+05 | 2.02E+05 | 2.82E+05 | 3.71E+05 | 3.97E+05 | 4.31E+05 | 4.47E+05 | 4.35E+05 | 4.45E+03                                   |  |
